# Supplementary material
Source: PubMed Central journal article supplement (PMC1502515)
Supplement: pnas_0603865103_1.pdf [file pnas_0603865103_1.pdf]

Prolin-rich region

50

CYP81D2 MEAELMLLIFTFCLFVLSLIFLIGRIKRL-KLNLPPSPA<sup>W</sup>ALPVI<sup>G</sup>HRLRLKLP<sup>L</sup>LHRYVFLSV<sup>S</sup>QSLGDA  
 CYP81Q1 MEAEMLYSALALTFALFMVYRILSNSQDKRSLTKLPPSPPGWLPVI<sup>G</sup>HAHLMKNLLHRTLYDF<sup>S</sup>QKLG--  
 CYP81Q2 MEAEMLYSALALTFALFMVYRILSNSQDKRSLTKLPPSPPGWLPVI<sup>G</sup>HVHLMKNLLHRTLYDF<sup>S</sup>QKLG--  
 CYP81Q3 MEAEMLYSALALTFALIMVHRILSNSQDKRSLTKLPPSPPGWLPVI<sup>G</sup>HHLIKNPLHRTLYDC<sup>S</sup>QKLG--

100

PIISRLRLGNRL<sup>L</sup>LFVVS<sup>S</sup>HSIAEECFTKNDVILANR-<sup>Q</sup>TTIS<sup>T</sup>TKHIS<sup>Y</sup>GNSTVVS<sup>S</sup>AS<sup>Y</sup>SEHWRNLRRI<sup>G</sup>AL  
 PIFSRIRFGSRLVVVSSSSSLVEECFTKYDIVLANR<sup>P</sup>QALSVD<sup>R</sup>RRSLGFSTTSVIGAPYGDHWRNLRKLCDL  
 PIFSLR<sup>F</sup>GRTRLVVVSSSSSLVEECFTKYDIVLANR<sup>P</sup>QALSVD<sup>R</sup>RRSLGFSTTSVIGAPYGDHWRNLRKLCDL  
 SIFSV<sup>W</sup>FGSRLVVVSSSSSLVEECFTKYDIVLANR<sup>P</sup>D<sup>L</sup>HL<sup>D</sup>LRSLGALSTISVIGAPYGDHWRNLRKLCDL

150

EIFS<sup>A</sup>HRLNS<sup>S</sup>FS<sup>S</sup>SIR<sup>R</sup>DEIR<sup>R</sup>RL<sup>L</sup>IGR<sup>L</sup>LLRN<sup>S</sup>SYGF<sup>T</sup>KVEMK<sup>S</sup>MFSD<sup>L</sup>TFNNI<sup>I</sup>RMLAGK<sup>C</sup>Y<sup>Y</sup>YGD<sup>G</sup>K<sup>K</sup>EDD<sup>P</sup>PE  
 EVFAP<sup>T</sup>RLAS<sup>F</sup>LS<sup>S</sup>IR<sup>R</sup>LDER<sup>D</sup>DRM<sup>S</sup>SALY<sup>K</sup>ISSAG<sup>F</sup>AKVN<sup>L</sup>EAK<sup>I</sup>VELTFNNI<sup>M</sup>RMVAAK<sup>R</sup>Y<sup>Y</sup>YGEAAEDDEE  
 EVFAP<sup>T</sup>RLAS<sup>F</sup>LS<sup>S</sup>IR<sup>R</sup>LDER<sup>D</sup>DRM<sup>S</sup>SALY<sup>K</sup>ISSAG<sup>F</sup>AKVN<sup>L</sup>EAK<sup>I</sup>VELTFNNI<sup>M</sup>RMVAG<sup>R</sup>Y<sup>Y</sup>YGEAAEDDEE  
 EVFAP<sup>T</sup>RLAS<sup>F</sup>LS<sup>S</sup>IR<sup>R</sup>LDER<sup>D</sup>DRM<sup>S</sup>GLY<sup>K</sup>ISSAG<sup>L</sup>AKVN<sup>L</sup>EAK<sup>I</sup>IAELTFNNI<sup>M</sup>RMVAG<sup>R</sup>Y<sup>Y</sup>YGEAAEDDEE

200

250

AKR<sup>V</sup>RT<sup>L</sup>IA<sup>E</sup>AM<sup>S</sup>SS<sup>S</sup>GP<sup>G</sup>NA<sup>A</sup>ADY<sup>I</sup>PIL<sup>T</sup>WIT<sup>Y</sup>S--<sup>E</sup>TR<sup>I</sup>K<sup>K</sup>LAG<sup>R</sup>LDEF<sup>L</sup>LOGLV<sup>D</sup>EKRE<sup>E</sup>G<sup>K</sup>E<sup>K</sup>KE<sup>E</sup>NT<sup>M</sup>VD  
 AKR<sup>F</sup>RD<sup>L</sup>TKEA<sup>L</sup>EL<sup>T</sup>SA<sup>S</sup>SNP<sup>G</sup>E<sup>I</sup>FPIL<sup>R</sup>WL<sup>G</sup>C<sup>N</sup>GLE<sup>K</sup>KLAV<sup>H</sup>SR<sup>K</sup>TDEF<sup>M</sup>QGL<sup>L</sup>DEHRR<sup>G</sup>E--<sup>R</sup>QNT<sup>M</sup>VD  
 AKR<sup>F</sup>RD<sup>L</sup>TKEA<sup>L</sup>EL<sup>T</sup>SA<sup>S</sup>SNP<sup>G</sup>E<sup>I</sup>FPIL<sup>R</sup>WL<sup>G</sup>F<sup>C</sup>NG<sup>L</sup>E<sup>K</sup>KLAV<sup>H</sup>SR<sup>K</sup>TDEF<sup>M</sup>QGL<sup>L</sup>DEHRR<sup>G</sup>E--<sup>R</sup>QNT<sup>M</sup>VD  
 AKR<sup>F</sup>RD<sup>M</sup>TKEA<sup>L</sup>EL<sup>M</sup>NT<sup>F</sup>NL<sup>A</sup>E<sup>I</sup>FPIL<sup>R</sup>WL<sup>G</sup>C<sup>N</sup>G<sup>L</sup>E<sup>K</sup>QL<sup>P</sup>V<sup>H</sup>SR<sup>K</sup>TDEF<sup>I</sup>MQGL<sup>L</sup>DEHRR<sup>G</sup>E--<sup>R</sup>QNT<sup>M</sup>VD

K region

300

HLL<sup>C</sup>LQET<sup>O</sup>PEY<sup>Y</sup>MD<sup>R</sup>RI<sup>I</sup>K<sup>G</sup>T<sup>M</sup>L<sup>S</sup>LI<sup>I</sup>AGG<sup>T</sup>DT<sup>I</sup>AV<sup>T</sup>L<sup>E</sup>WAL<sup>S</sup>S<sup>L</sup>LN<sup>N</sup>P<sup>E</sup>V<sup>L</sup>N<sup>K</sup>AR<sup>D</sup>E<sup>I</sup>D<sup>R</sup>M<sup>I</sup>G<sup>V</sup>D<sup>R</sup>L<sup>L</sup>EE<sup>S</sup>  
 HLL<sup>S</sup>LQES<sup>O</sup>PEY<sup>Y</sup>T<sup>D</sup>E<sup>I</sup>IT<sup>G</sup>L<sup>I</sup>VAL<sup>I</sup>I<sup>I</sup>AGT<sup>D</sup>AS<sup>V</sup>TT<sup>E</sup>WAM<sup>S</sup>LL<sup>L</sup>N<sup>H</sup>PK<sup>V</sup>LE<sup>K</sup>ARK<sup>K</sup>E<sup>L</sup>DT<sup>L</sup>V<sup>G</sup>HER<sup>M</sup>VD  
 HLL<sup>S</sup>LQES<sup>O</sup>PEY<sup>Y</sup>T<sup>D</sup>E<sup>I</sup>IT<sup>G</sup>L<sup>I</sup>VAL<sup>I</sup>I<sup>I</sup>AGT<sup>D</sup>AS<sup>V</sup>TT<sup>E</sup>WAM<sup>S</sup>LL<sup>L</sup>N<sup>H</sup>PK<sup>V</sup>LE<sup>K</sup>ARK<sup>K</sup>E<sup>L</sup>DT<sup>L</sup>V<sup>G</sup>HER<sup>M</sup>VD  
 HLL<sup>S</sup>LQES<sup>O</sup>PDY<sup>Y</sup>T<sup>D</sup>E<sup>I</sup>IT<sup>G</sup>L<sup>I</sup>VAL<sup>I</sup>I<sup>I</sup>AGT<sup>D</sup>AS<sup>V</sup>TT<sup>E</sup>WAM<sup>S</sup>LL<sup>L</sup>N<sup>H</sup>PK<sup>V</sup>LE<sup>K</sup>ARK<sup>K</sup>E<sup>M</sup>DT<sup>L</sup>V<sup>G</sup>HER<sup>M</sup>V<sup>E</sup>

350

K helix

Aromatic region

400

SD<sup>I</sup>PN<sup>L</sup>LP<sup>L</sup>YL<sup>Q</sup>NI<sup>V</sup>SET<sup>L</sup>RL<sup>L</sup>Y<sup>P</sup>AA<sup>P</sup>ML<sup>L</sup>PH<sup>V</sup>AS<sup>K</sup>DC<sup>K</sup>VG<sup>G</sup>Y<sup>D</sup>MP<sup>R</sup>GT<sup>M</sup>LL<sup>T</sup>N<sup>A</sup>WA<sup>I</sup>HR<sup>D</sup>PK<sup>V</sup>WDD<sup>P</sup>TS<sup>F</sup>FK<sup>P</sup>  
 HD<sup>L</sup>PK<sup>L</sup>RY<sup>L</sup>HC<sup>I</sup>IV<sup>L</sup>ET<sup>L</sup>RL<sup>L</sup>F<sup>P</sup>SV<sup>P</sup>TL<sup>V</sup>PH<sup>E</sup>PS<sup>E</sup>DC<sup>K</sup>IG<sup>G</sup>YN<sup>V</sup>PK<sup>G</sup>TM<sup>L</sup>VN<sup>A</sup>WA<sup>I</sup>HR<sup>D</sup>PK<sup>V</sup>WDD<sup>P</sup>LS<sup>F</sup>FK<sup>P</sup>  
 HD<sup>L</sup>PK<sup>L</sup>RY<sup>L</sup>HC<sup>I</sup>IV<sup>L</sup>ET<sup>L</sup>RL<sup>L</sup>F<sup>P</sup>SV<sup>P</sup>TL<sup>V</sup>PH<sup>E</sup>PS<sup>E</sup>DC<sup>K</sup>IG<sup>G</sup>YN<sup>V</sup>PK<sup>G</sup>TM<sup>L</sup>VN<sup>A</sup>WA<sup>I</sup>HR<sup>D</sup>PK<sup>V</sup>WDD<sup>P</sup>LS<sup>F</sup>FK<sup>P</sup>  
 DD<sup>L</sup>PK<sup>L</sup>RY<sup>L</sup>HY<sup>I</sup>IL<sup>L</sup>ET<sup>L</sup>RL<sup>L</sup>F<sup>P</sup>SV<sup>P</sup>TL<sup>V</sup>PH<sup>E</sup>PS<sup>E</sup>DC<sup>N</sup>I<sup>G</sup>GY<sup>N</sup>V<sup>P</sup>PK<sup>G</sup>TM<sup>I</sup>VN<sup>A</sup>WA<sup>I</sup>HR<sup>D</sup>PK<sup>V</sup>WDD<sup>P</sup>MS<sup>F</sup>FK<sup>P</sup>

Heme-binding

450

ERF<sup>E</sup>-<sup>K</sup>EGE<sup>A</sup>KK<sup>L</sup>ML<sup>P</sup>F<sup>G</sup>L<sup>G</sup>RR<sup>A</sup>CP<sup>G</sup>SG<sup>L</sup>LA<sup>Q</sup>RL<sup>V</sup>TL<sup>S</sup>LS<sup>L</sup>GS<sup>L</sup>I<sup>Q</sup>CF<sup>E</sup>WER<sup>I</sup>IS<sup>A</sup>E<sup>L</sup>IV<sup>D</sup>MT<sup>E</sup>GP<sup>G</sup>-<sup>L</sup>TM<sup>P</sup>KAR<sup>L</sup>P  
 DRF<sup>E</sup>LM<sup>E</sup>VEV<sup>T</sup>H<sup>K</sup>LL<sup>P</sup>F<sup>G</sup>MG<sup>R</sup>RR<sup>A</sup>CP<sup>G</sup>AG<sup>L</sup>A<sup>Q</sup>K<sup>F</sup>V<sup>G</sup>LAL<sup>G</sup>SL<sup>I</sup>Q<sup>C</sup>FD<sup>W</sup>ERT<sup>S</sup>SP<sup>E</sup>IK<sup>I</sup>DL<sup>N</sup>EG<sup>S</sup>G<sup>-</sup>IT<sup>L</sup>PKAK<sup>T</sup>  
 DRF<sup>E</sup>LM<sup>E</sup>VEV<sup>T</sup>H<sup>K</sup>LL<sup>P</sup>F<sup>G</sup>MG<sup>R</sup>RR<sup>A</sup>CP<sup>G</sup>AG<sup>L</sup>A<sup>Q</sup>K<sup>F</sup>V<sup>G</sup>LAL<sup>G</sup>SL<sup>I</sup>Q<sup>C</sup>FD<sup>W</sup>ERT<sup>S</sup>SA<sup>E</sup>IK<sup>I</sup>DL<sup>N</sup>EG<sup>S</sup>G<sup>-</sup>IT<sup>L</sup>PKAK<sup>T</sup>  
 DRF<sup>E</sup>TL<sup>E</sup>V<sup>E</sup>T<sup>H</sup>K<sup>L</sup>LP<sup>F</sup>GM<sup>G</sup>RR<sup>R</sup>GC<sup>P</sup>GA<sup>G</sup>LA<sup>K</sup>K<sup>F</sup>V<sup>G</sup>LAL<sup>A</sup>SL<sup>I</sup>Q<sup>C</sup>FD<sup>W</sup>ERT<sup>I</sup>SA<sup>E</sup>IK<sup>I</sup>DL<sup>K</sup>EGA<sup>S</sup>R<sup>I</sup>IT<sup>L</sup>PKAK<sup>T</sup>

\*

500

LEAMCR<sup>A</sup>RD<sup>F</sup>V<sup>G</sup>K<sup>I</sup>L<sup>P</sup>DS<sup>S</sup>\*  
 LEAMCK<sup>P</sup>RR<sup>H</sup>VM<sup>E</sup>K<sup>V</sup>L<sup>R</sup>Q<sup>V</sup>SN<sup>V</sup>\*  
 LEAMCK<sup>P</sup>RR<sup>H</sup>IM<sup>E</sup>R<sup>V</sup>L<sup>R</sup>Q<sup>V</sup>SN<sup>V</sup>\*  
 LEAMCK<sup>P</sup>RR<sup>H</sup>VM<sup>E</sup>K<sup>V</sup>L<sup>R</sup>Q<sup>V</sup>SN<sup>V</sup>\*
