# Supplementary material
Source: PubMed Central journal article supplement (PMC1502515)

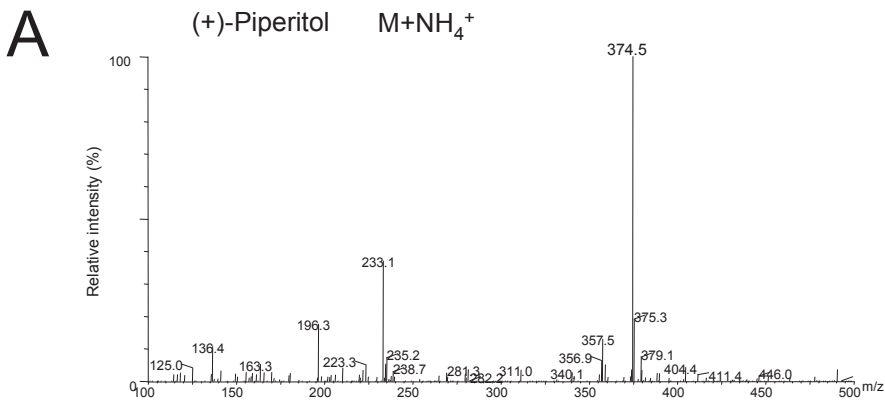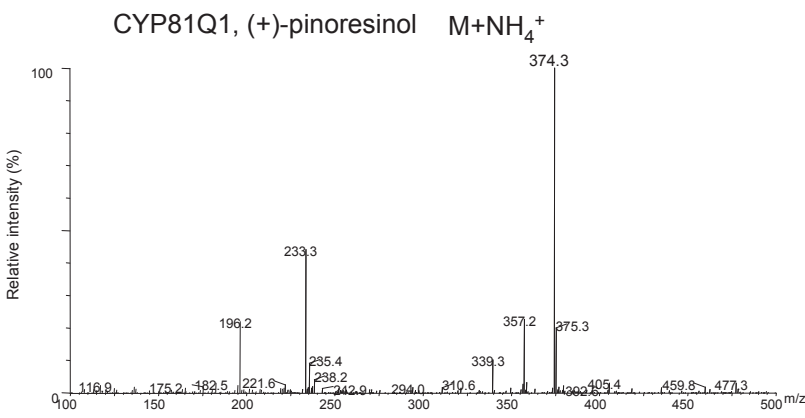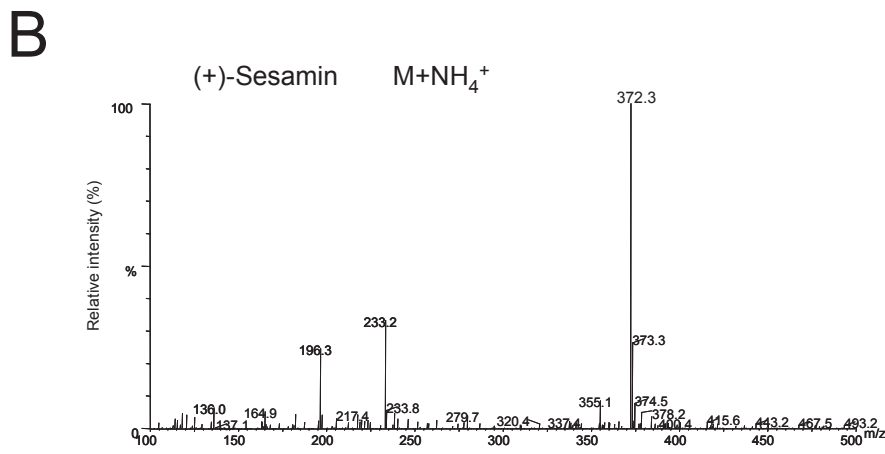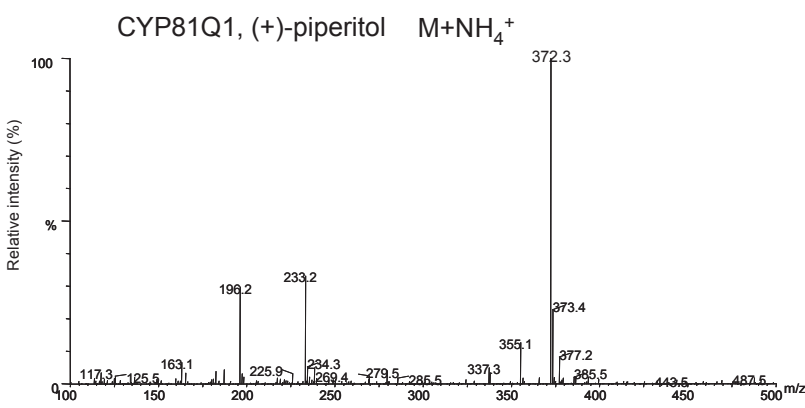

Supplement: pnas_0603865103_2.pdf [file pnas_0603865103_2.pdf]

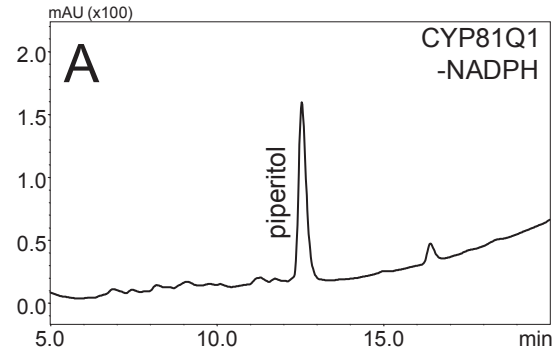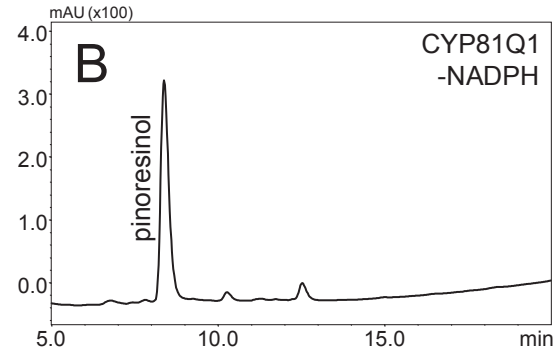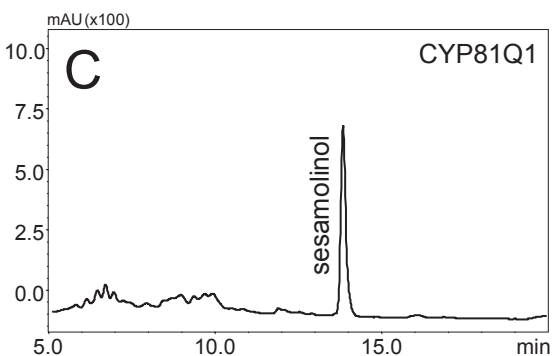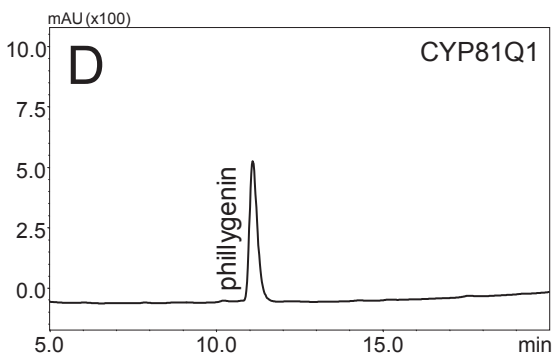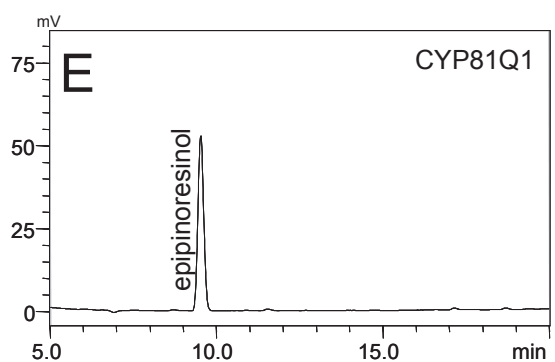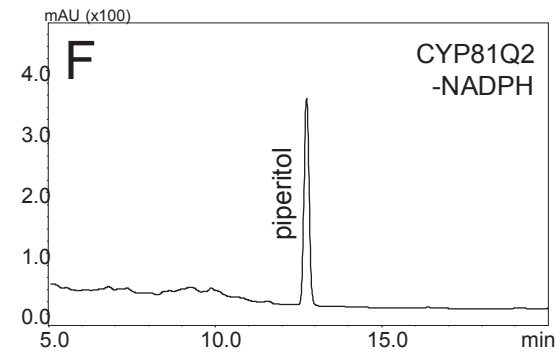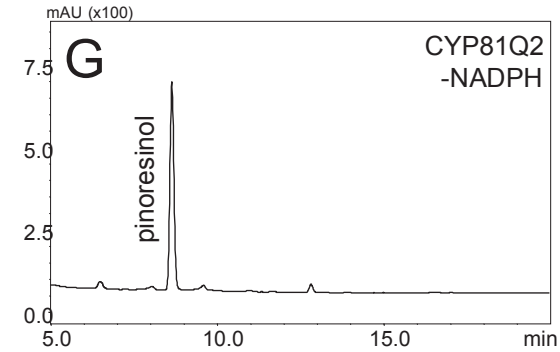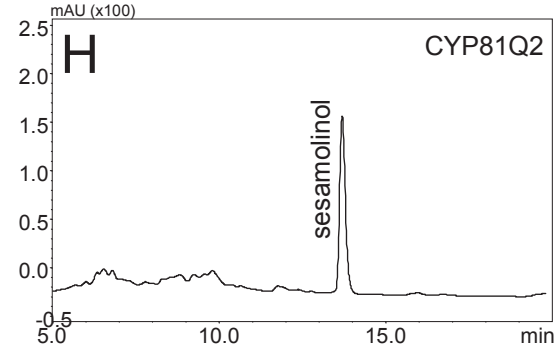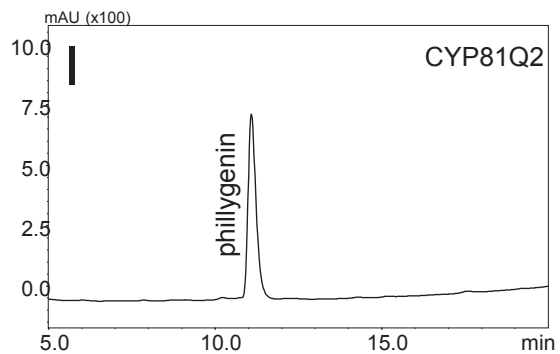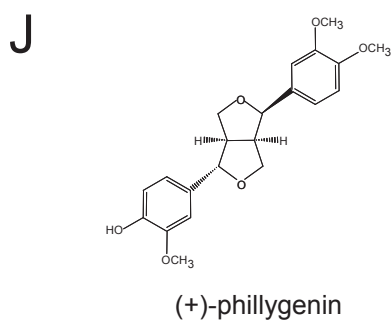

Supplement: pnas_0603865103_3.pdf [file pnas_0603865103_3.pdf]

**A**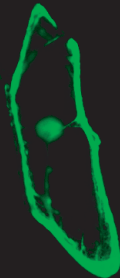**GFP**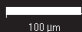**B**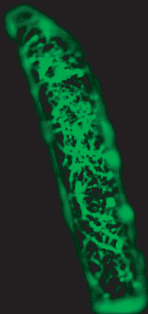**CYP81Q1-GFP**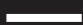**C**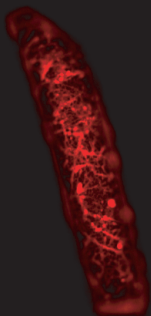**SP-mRFP-HDEL**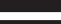**D**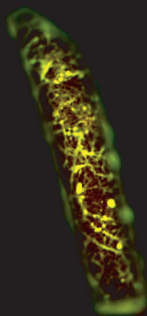**Merge**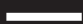**E**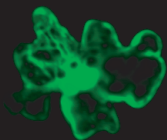**GFP**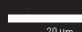**F**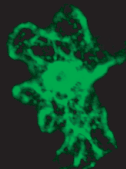**CYP81Q1-GFP**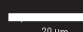

Supplement: pnas_0603865103_4.pdf [file pnas_0603865103_4.pdf]

# A

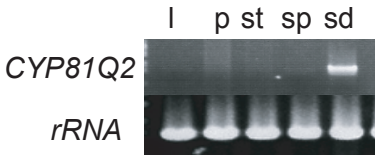

# B

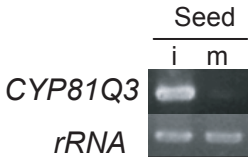

Supplement: pnas_0603865103_5.pdf [file pnas_0603865103_5.pdf]
